# Supplementary material
Source: publisher figshare collection journal article supplement (https://karger.figshare.com/ndownloader/files/36432846)
Supplement: Supplementary file 1 [file 36432846]

**Table S1. Univariate analysis for predictors of S1-IgG antibody levels in response to a third dose of BNT162b2 vaccine**

Univariate analysis of factors associated with the serologic response (log transformed anti-SI-RBD IgG levels in AU/mL) in all study participants (hemodialysis patients and health-care workers) vaccinated with a third dose (V3) of BNT162b2 vaccine.

| **Variable** | **B (95%CI)** | ***p* - Value** |
| --- | --- | --- |
| **Age (per year)** | -0.01 (-0.02 to 0.0) | 0.038 |
| **Female sex** | 0.18 (-0.07 to 0.43) | 0.151 |
| **Dialysis** | -0.16 (-0.04 to -0.28) | 0.009 |
| **Diabetes Mellitus** | -0.13 (0.37 to 0.12) | 0.303 |
| **BMI (per kg/m2)** | 0.02 (-0.01 to 0.05) | 0.108 |
| **Log Ab level before V3** | 0.75 (0.63 to 0.87) | <0.001 |
